# Supplementary material for: Improved Prediction of Bacterial Genotype-Phenotype Associations Using Interpretable Pangenome-Spanning Regressions
Source: PubMed Central journal article supplement (PMC7343994; doi:10.1128/mbio.01344-20), 2020-07-07

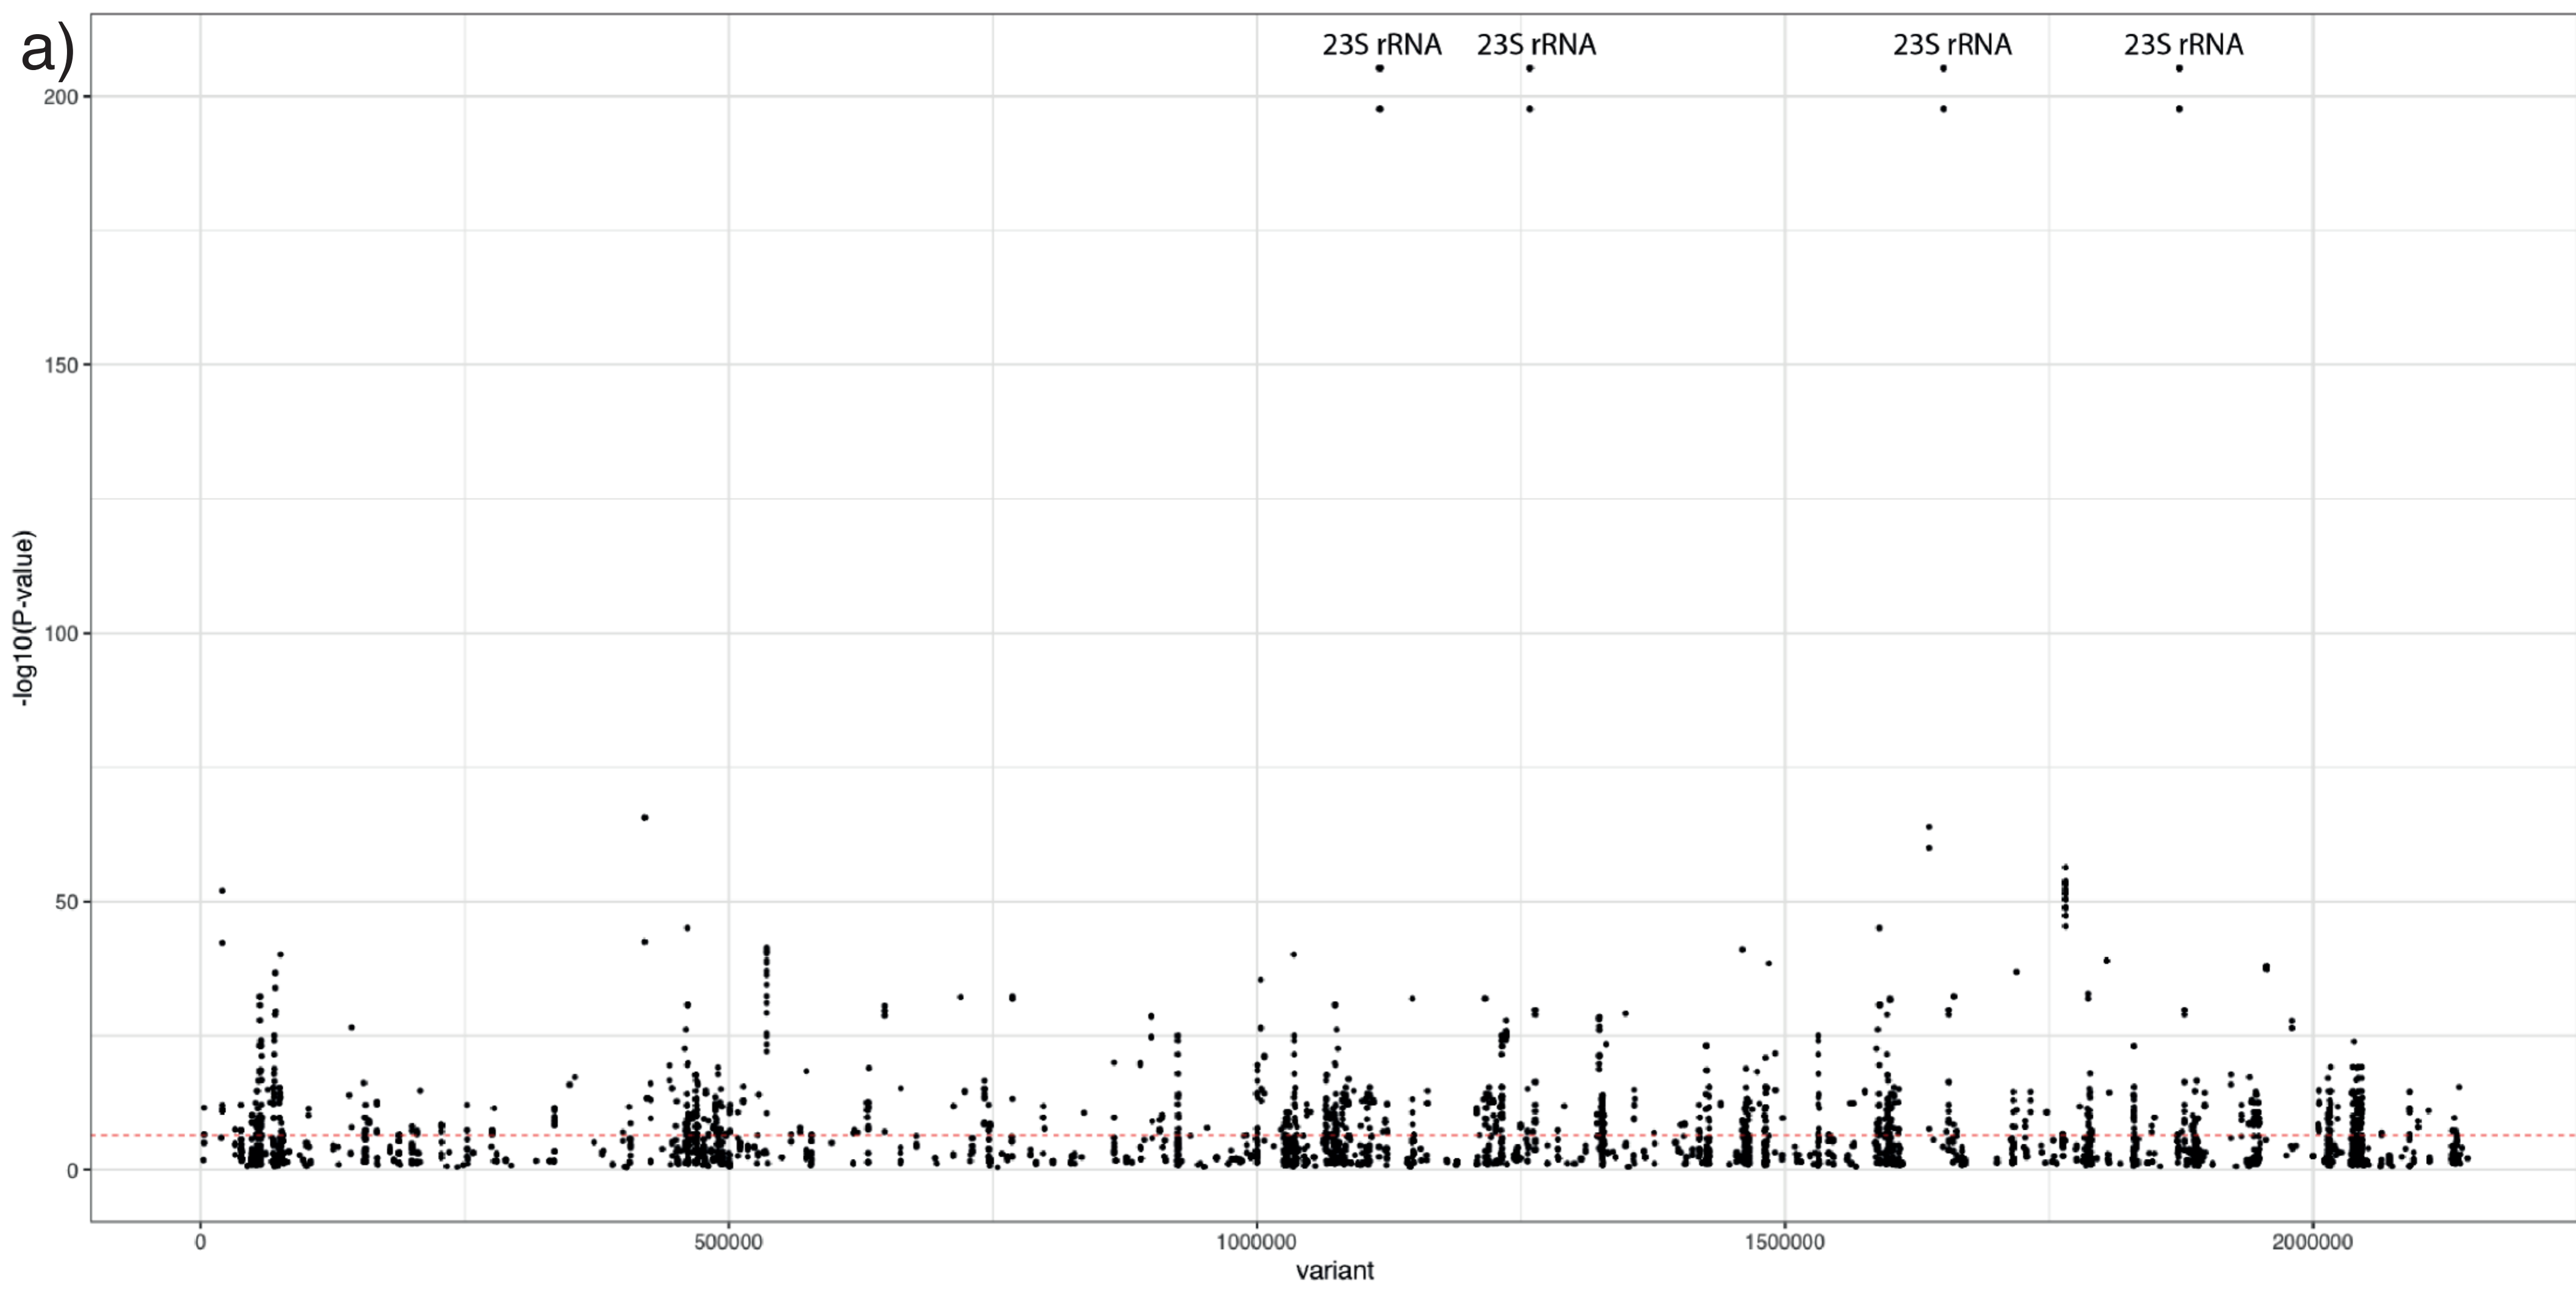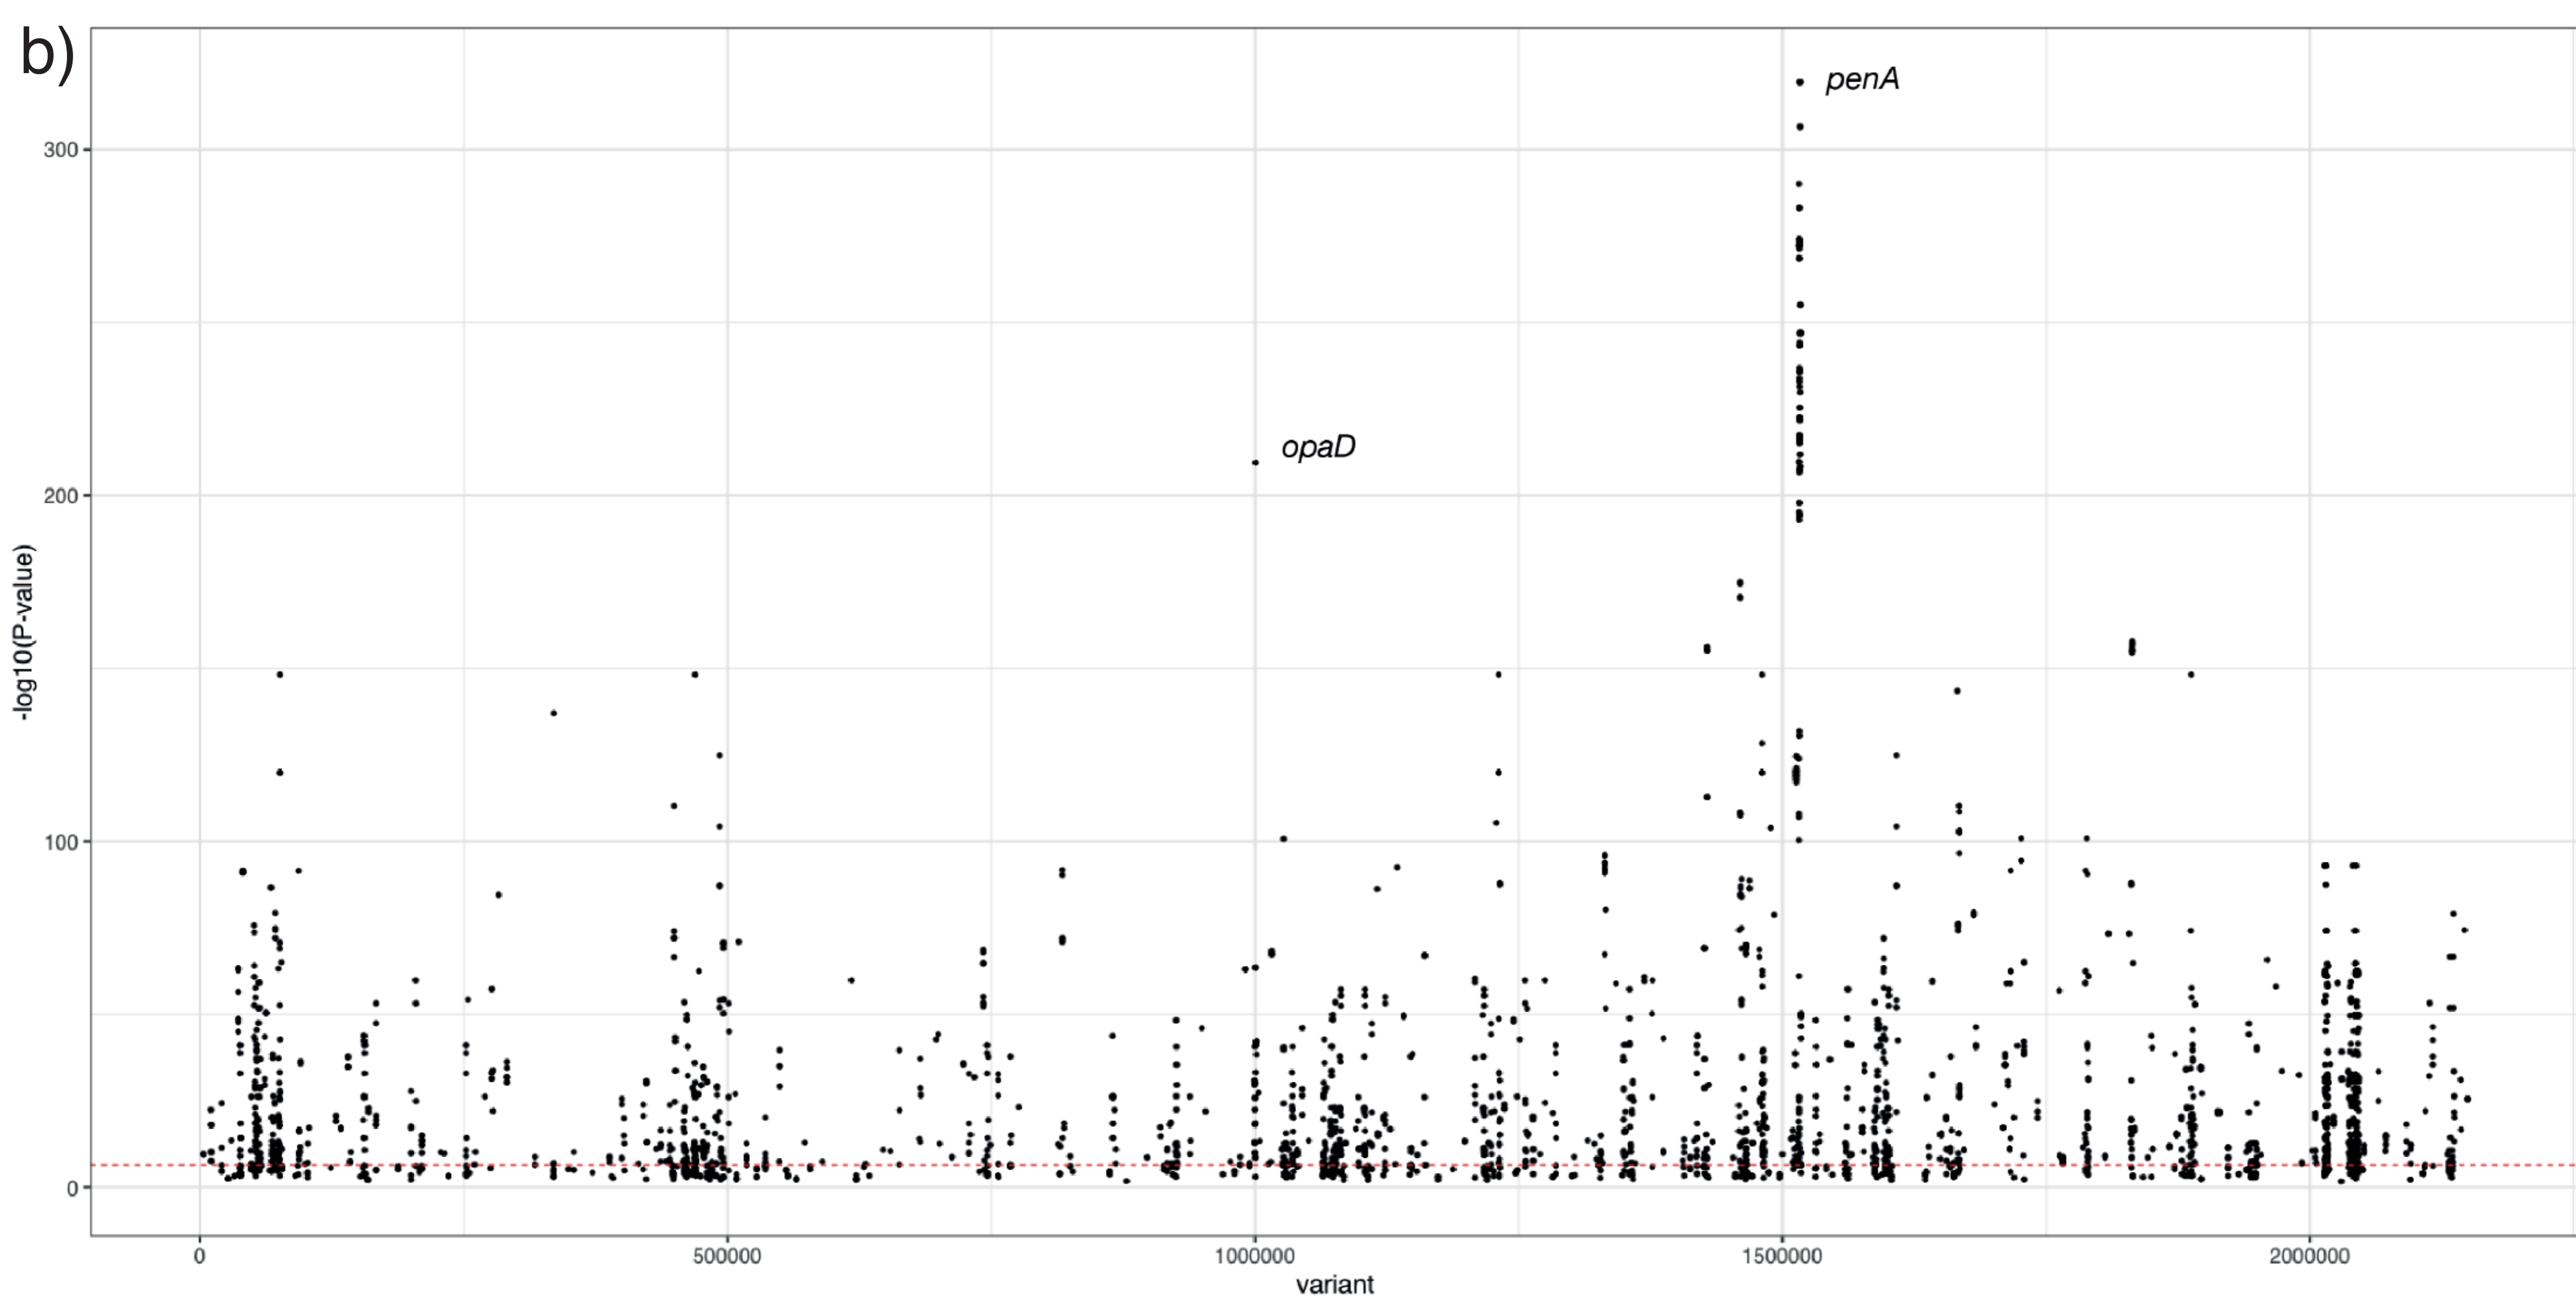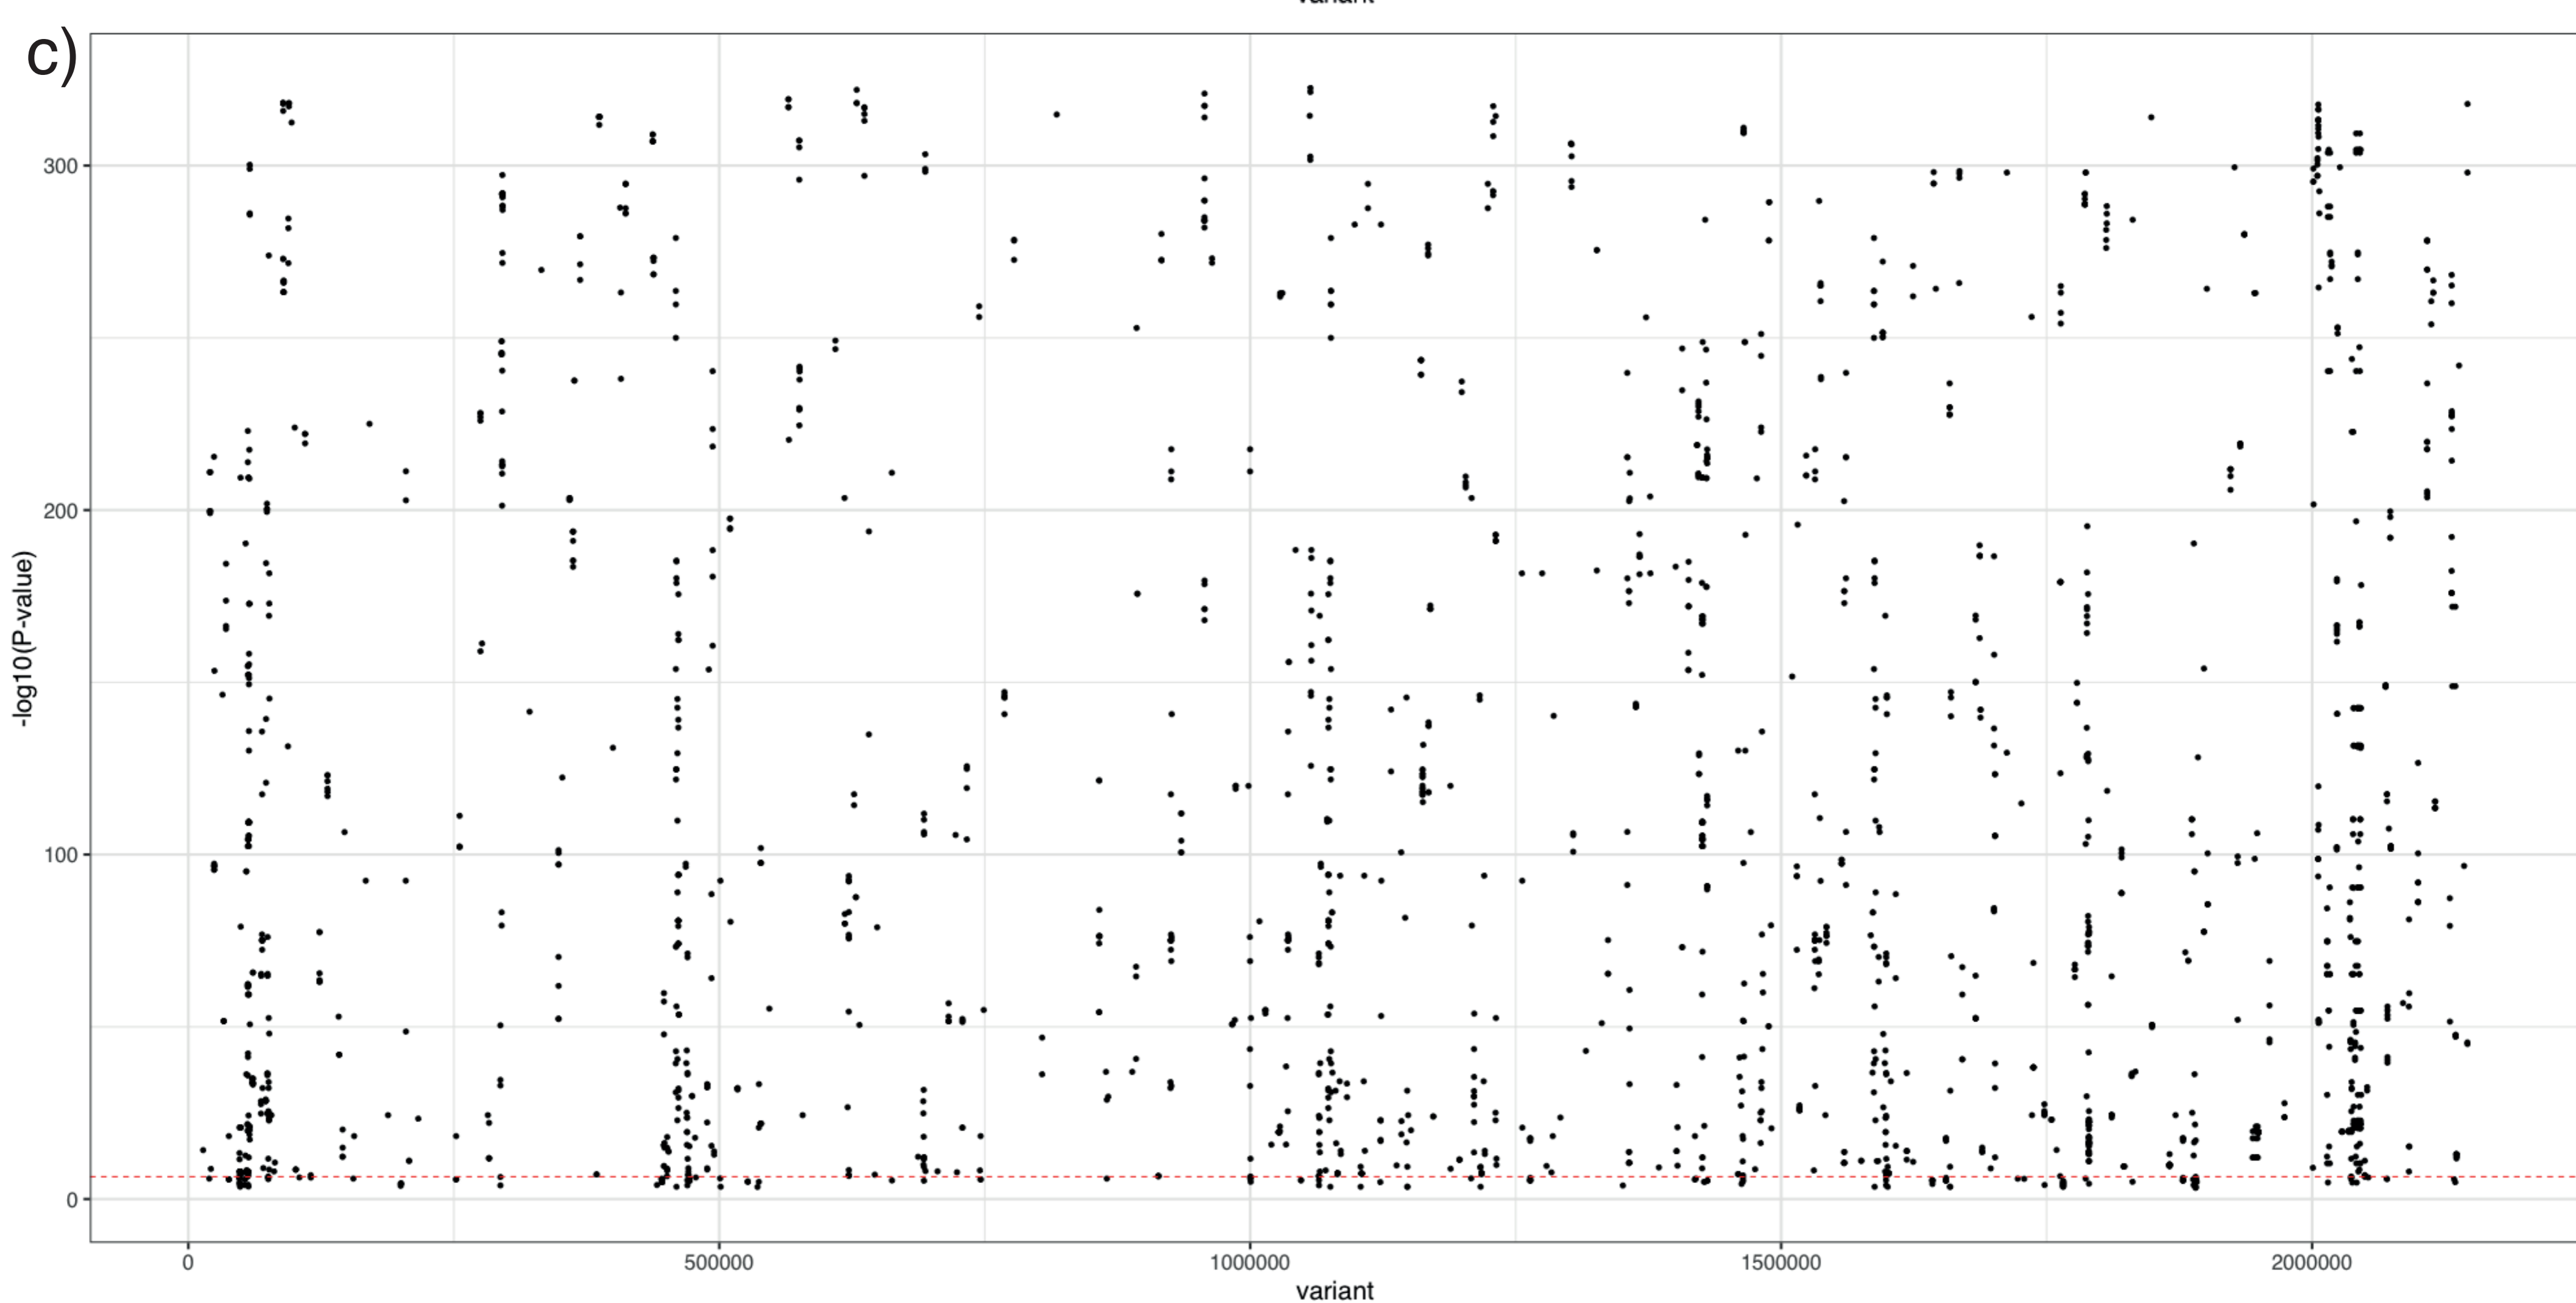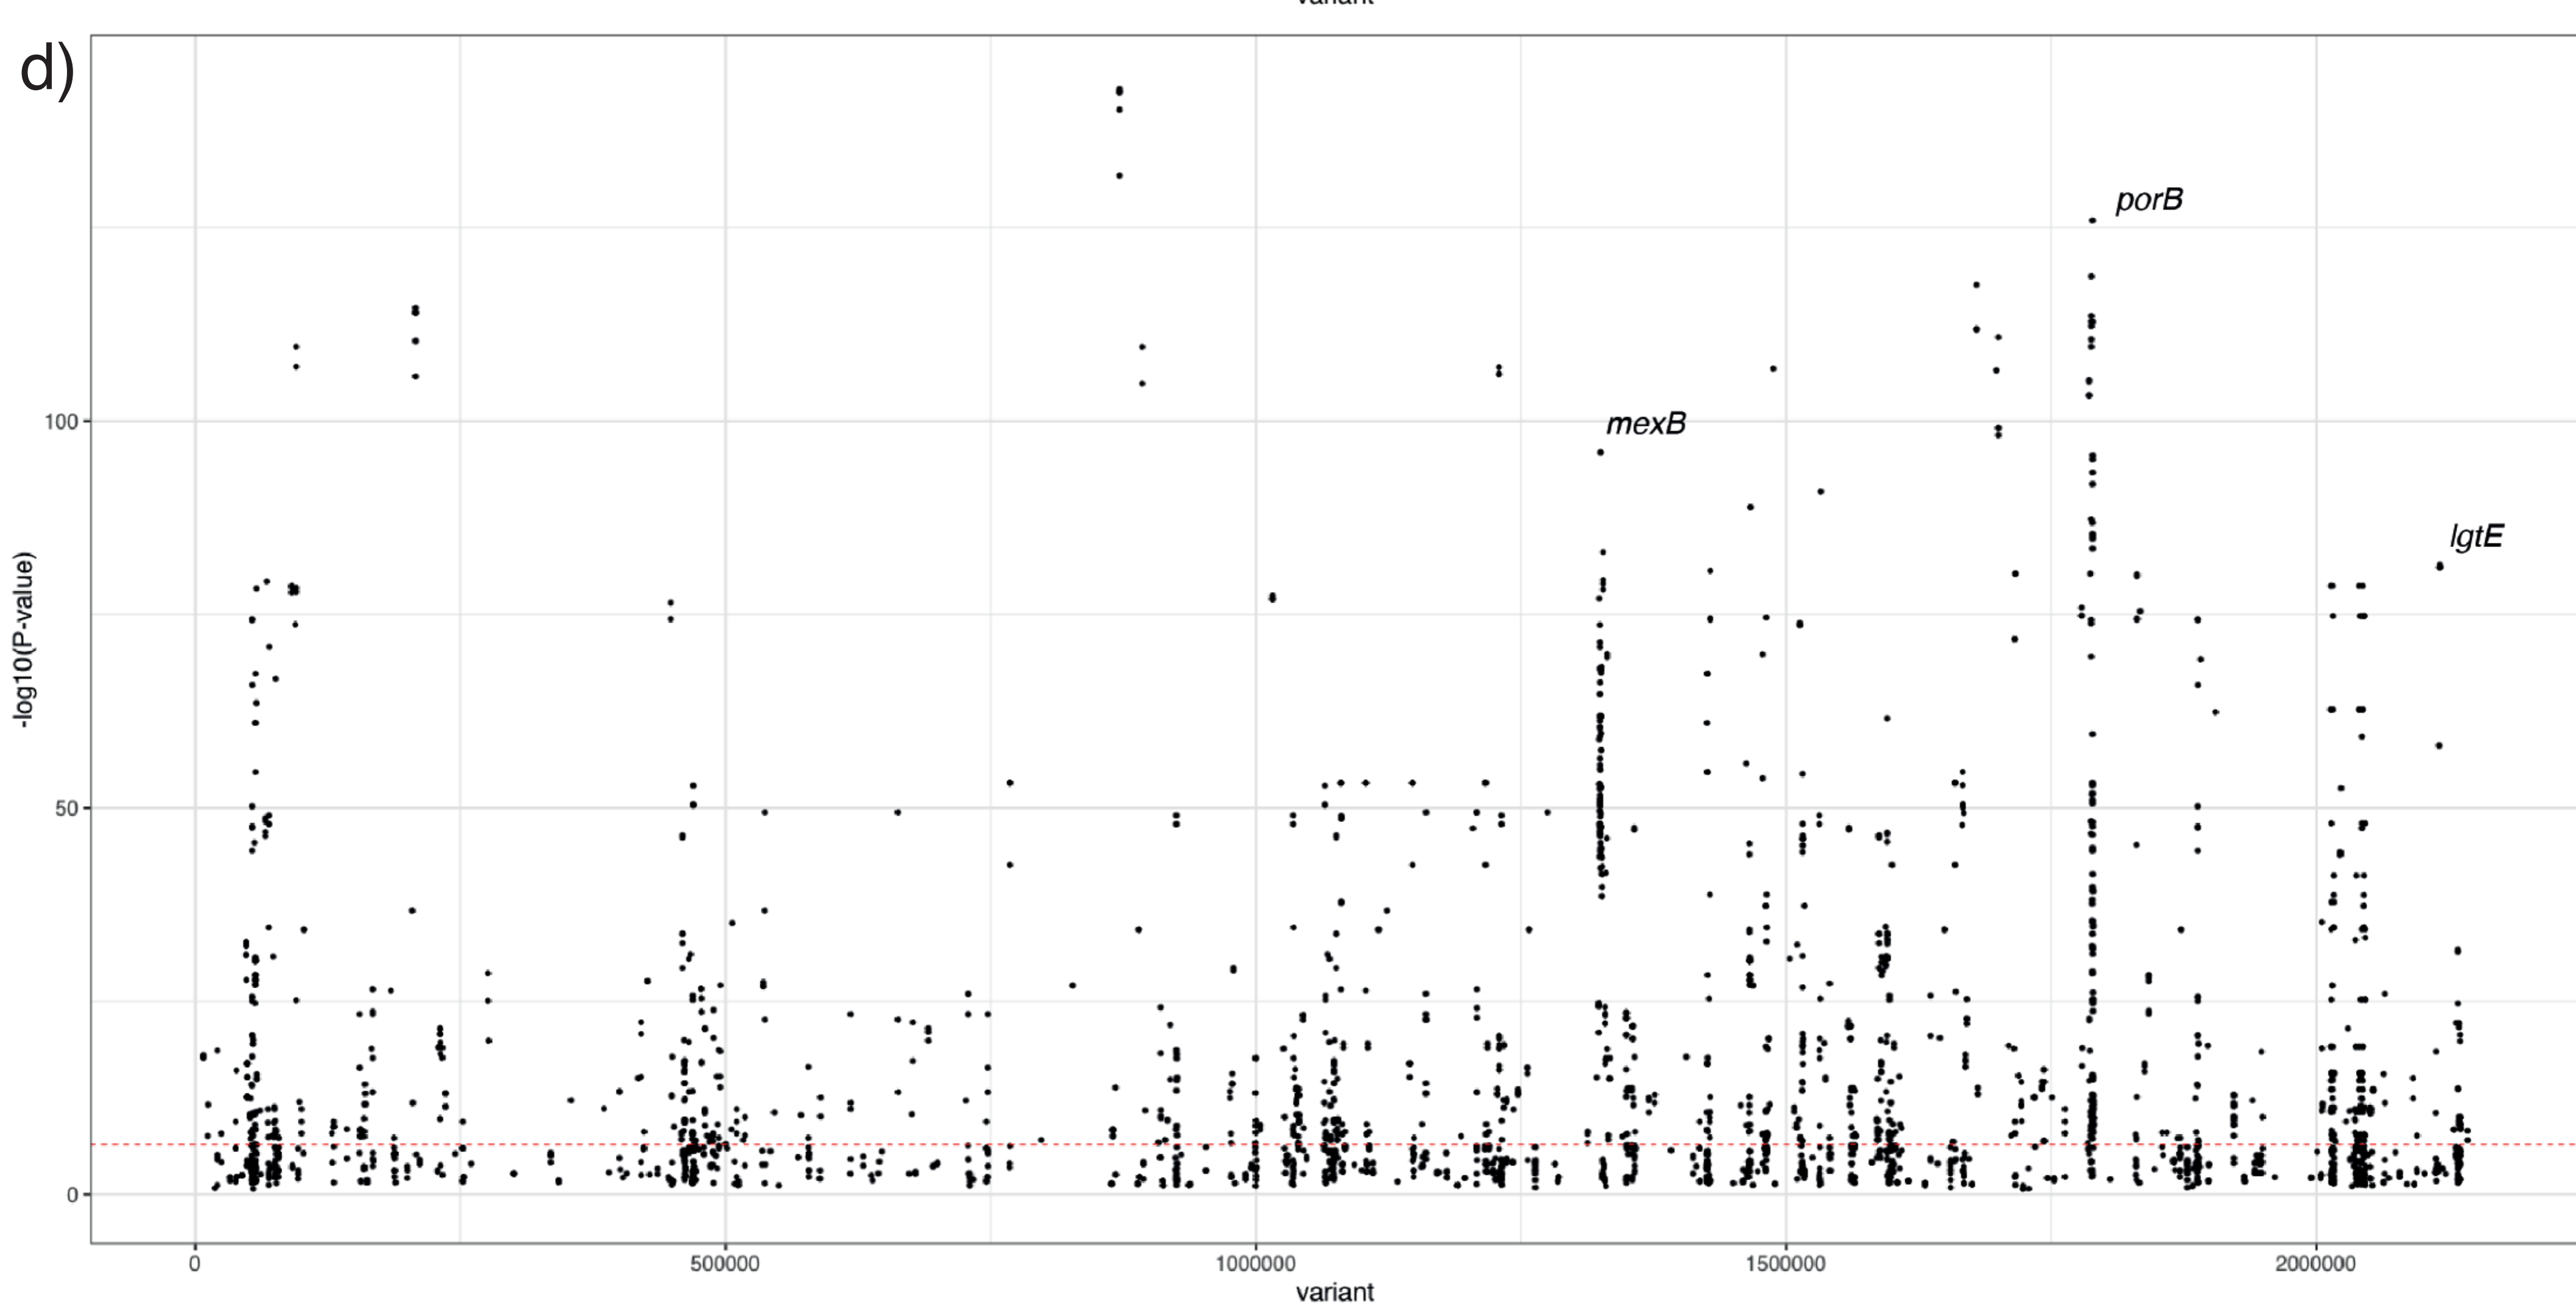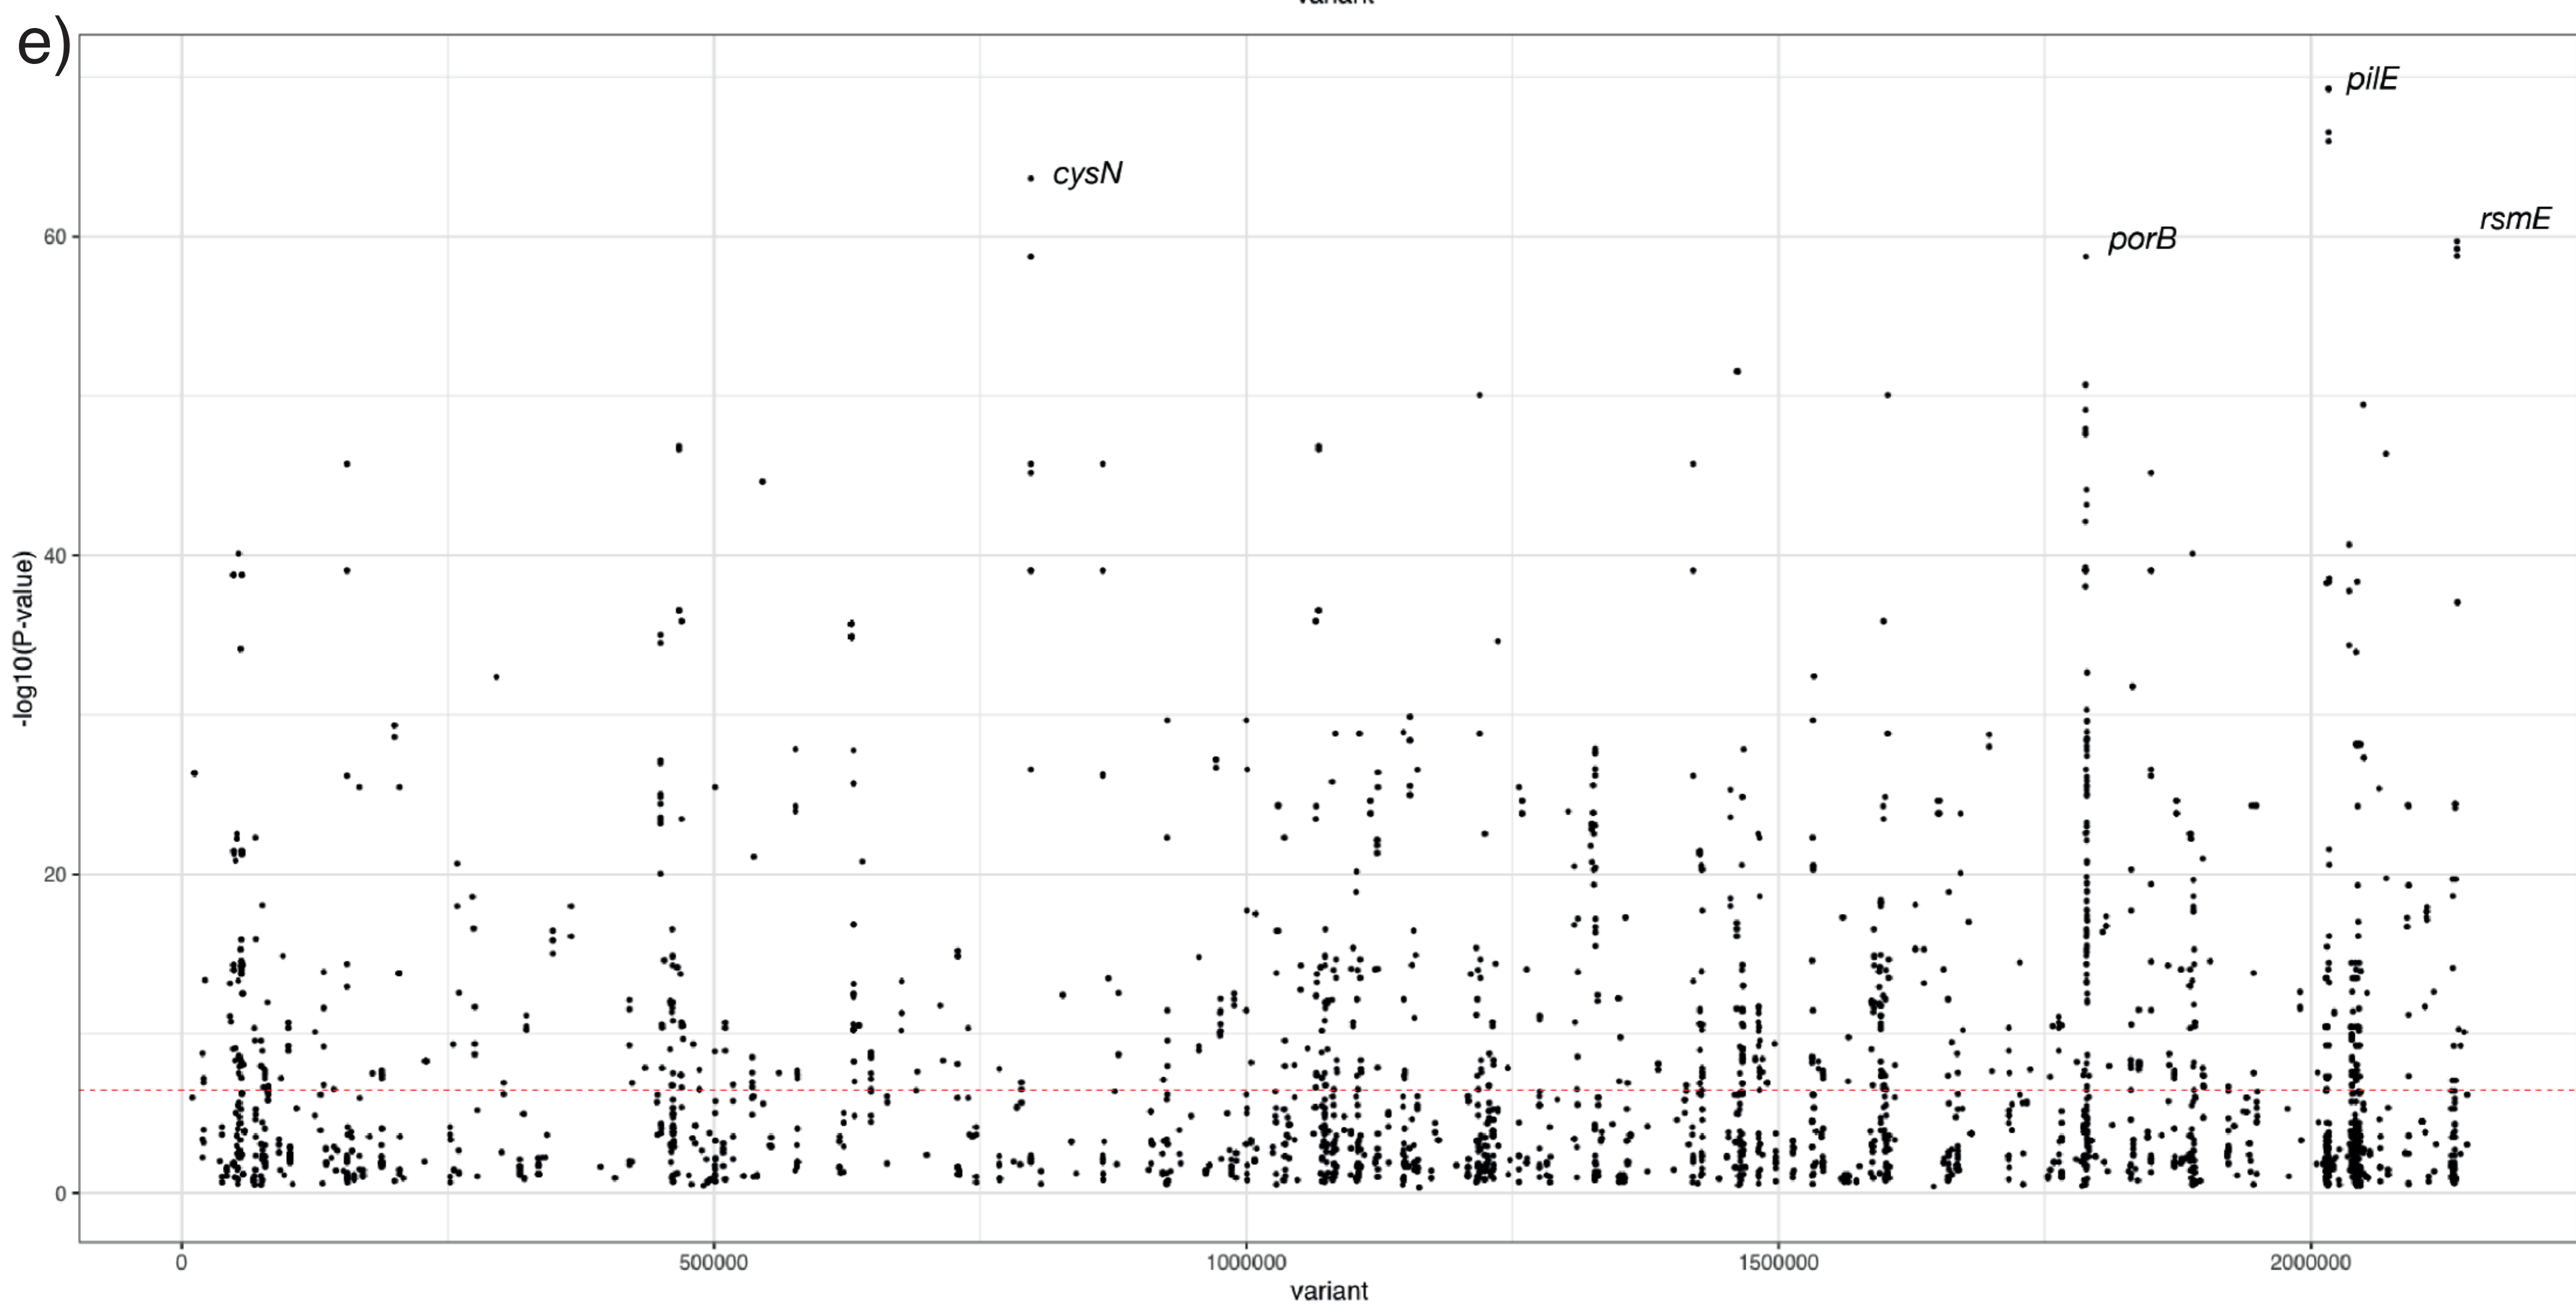

Supplement: mBio.01344-20-sf006.pdf [file mBio.01344-20-sf006.pdf]
