# Supplementary material for: Improved Prediction of Bacterial Genotype-Phenotype Associations Using Interpretable Pangenome-Spanning Regressions
Source: PubMed Central journal article supplement (PMC7343994; doi:10.1128/mbio.01344-20), 2020-07-07
Supplement: mBio.01344-20-st001.pdf [file mBio.01344-20-st001.pdf]

| Drug       | Model        | Variants Selected | Lineage | $R^2$ | TP   | TN  | FP  | FN |    |
|------------|--------------|-------------------|---------|-------|------|-----|-----|----|----|
| Rifampicin | Weighted     | 90                | All     | 0.84  | 752  | 388 | 32  | 11 |    |
|            |              |                   | 1       | 0.42  | 63   | 354 | 26  | 9  |    |
|            |              |                   | 2       | 0.76  | 420  | 22  | 4   | 2  |    |
|            |              |                   | 3       | 0.83  | 201  | 5   | 1   | 0  |    |
|            |              |                   | 4       | 0.79  | 68   | 4   | 1   | 0  |    |
|            | Unweighted   | 132               | All     | 0.86  | 755  | 388 | 29  | 8  |    |
|            |              |                   | 1       | 0.42  | 65   | 356 | 24  | 7  |    |
|            |              |                   | 2       | 0.76  | 421  | 23  | 3   | 1  |    |
|            |              |                   | 3       | 0.83  | 201  | 5   | 1   | 0  |    |
|            |              |                   | 4       | 0.79  | 68   | 4   | 1   | 0  |    |
|            | WDNN         | All               | 0.84    | 723   | 411  | 9   | 35  |    |    |
|            | Isoniazid    | Weighted          | 151     | All   | 0.85 | 657 | 487 | 38 | 6  |
|            |              |                   |         | 1     | 0.52 | 43  | 394 | 18 | 1  |
| 2          |              |                   |         | 0.69  | 389  | 59  | 14  | 5  |    |
| 3          |              |                   |         | 0.80  | 166  | 19  | 4   | 0  |    |
| 4          |              |                   |         | 0.85  | 59   | 15  | 2   | 0  |    |
| Unweighted |              | 185               | All     | 0.84  | 657  | 484 | 41  | 6  |    |
|            |              |                   | 1       | 0.45  | 43   | 391 | 21  | 1  |    |
|            |              |                   | 2       | 0.69  | 389  | 59  | 14  | 5  |    |
|            |              |                   | 3       | 0.80  | 166  | 19  | 4   | 0  |    |
|            |              |                   | 4       | 0.85  | 59   | 15  | 2   | 0  |    |
| WDNN       |              | All               | 0.72    | 599   | 506  | 19  | 64  |    |    |
| Ethambutol |              | Weighted          | 32      | All   | 0.59 | 799 | 278 | 57 | 41 |
|            |              |                   |         | 1     | 0.13 | 89  | 272 | 39 | 41 |
|            | 2            |                   |         | 0.25  | 415  | 6   | 15  | 0  |    |
|            | 3            |                   |         | -     | 209  | 0   | 0   | 0  |    |
|            | 4            |                   |         | -     | 86   | 0   | 3   | 0  |    |
|            | Unweighted   | 258               | All     | 0.65  | 803  | 289 | 46  | 37 |    |
|            |              |                   | 1       | 0.27  | 97   | 277 | 34  | 33 |    |
|            |              |                   | 2       | 0.25  | 411  | 10  | 11  | 4  |    |
|            |              |                   | 3       | -     | 209  | 0   | 0   | 0  |    |
|            |              |                   | 4       | 0.67  | 86   | 2   | 1   | 0  |    |
|            | WDNN         | All               | 0.47    | 761   | 287  | 48  | 79  |    |    |
|            | Pyrazinamide | Weighted          | 192     | All   | 0.61 | 775 | 202 | 39 | 33 |
|            |              |                   |         | 1     | 0.28 | 82  | 189 | 21 | 32 |
| 2          |              |                   |         | 0.34  | 413  | 10  | 14  | 1  |    |
| 3          |              |                   |         | -     | 195  | 0   | 2   | 0  |    |
| 4          |              |                   |         | 0.58  | 85   | 3   | 2   | 0  |    |
| Unweighted |              | 328               | All     | 0.66  | 781  | 204 | 37  | 27 |    |
|            |              |                   | 1       | 0.36  | 90   | 187 | 23  | 24 |    |
|            |              |                   | 2       | 0.43  | 411  | 14  | 10  | 3  |    |
|            |              |                   | 3       | -     | 195  | 0   | 2   | 0  |    |
|            |              |                   | 4       | 0.58  | 85   | 3   | 2   | 0  |    |
| WDNN       |              | All               | -0.19   | 608   | 220  | 21  | 200 |    |    |
