# Supplementary material for: Improved Prediction of Bacterial Genotype-Phenotype Associations Using Interpretable Pangenome-Spanning Regressions
Source: PubMed Central journal article supplement (PMC7343994; doi:10.1128/mbio.01344-20), 2020-07-07
Supplement: mBio.01344-20-st002.pdf [file mBio.01344-20-st002.pdf]

| Dataset     | Phenotype    | $R^2$ | TP  | TN  | FP  | FN |
|-------------|--------------|-------|-----|-----|-----|----|
| GAS         | Virulence    | -0.05 | 327 | 107 | 752 | 34 |
| SPARC       | Penicillin   | 0.81  | 71  | 121 | 63  | 5  |
|             | Erythromycin | 0.61  | 11  | 161 | 15  | 17 |
| Netherlands | Meningitis   | 0.65  | 354 | 208 | 22  | 28 |
