# Supplementary material for: Improved Prediction of Bacterial Genotype-Phenotype Associations Using Interpretable Pangenome-Spanning Regressions
Source: PubMed Central journal article supplement (PMC7343994; doi:10.1128/mbio.01344-20), 2020-07-07
Supplement: mBio.01344-20-st003.pdf [file mBio.01344-20-st003.pdf]

|          | thresholds  | 500         | 1000        | 2000        | 3000        |
|----------|-------------|-------------|-------------|-------------|-------------|
| 5 snps   | the 1st Qu. | 5 (90248)   | 5 (90746)   | 5 (90658)   | 5 (90742)   |
|          | the median. | 5 (60411)   | 5 (60506)   | 5 (60507)   | 5 (60507)   |
|          | the 3rd Qu. | 4 (30247)   | 5 (30252)   | 4 (30254)   | 5 (30254)   |
| 25 snps  | the 1st Qu. | 25 (90690)  | 25 (90425)  | 25 (90721)  | 25 (90758)  |
|          | the median. | 23 (60216)  | 20 (60506)  | 23 (60507)  | 22 (60501)  |
|          | the 3rd Qu. | 14 (30222)  | 15 (30254)  | 15 (30254)  | 15 (30254)  |
| 100 snps | the 1st Qu. | 94 (90273)  | 95 (90733)  | 94 (90739)  | 95 (90729)  |
|          | the median. | 74 (57564)  | 77 (60487)  | 79 (60506)  | 74 (60427)  |
|          | the 3rd Qu. | 49 (30225)  | 50 (30254)  | 51 (30254)  | 48 (30254)  |
| 300 snps | the 1st Qu. | 273 (87892) | 284 (90661) | 283 (90681) | 277 (90760) |
|          | the median  | 219 (60479) | 219 (60501) | 219 (60506) | 217 (60494) |
|          | the 3rd Qu. | 148 (30253) | 145 (30250) | 141 (30254) | 144 (30254) |

|          | threshold   | 500         | 1000        | 2000        | 3000        |
|----------|-------------|-------------|-------------|-------------|-------------|
| 5 snps   | the 1st Qu. | 5 (90501)   | 5 (90755)   | 5 (90760)   | 5 (90759)   |
|          | the median  | 5 (60343)   | 5 (60506)   | 5 (60495)   | 5 (60505)   |
|          | the 3rd Qu. | 3 (30239)   | 3 (30245)   | 3 (30254)   | 3 (30254)   |
| 25 snps  | the 1st Qu. | 25 (89728)  | 25 (90755)  | 25 (90743)  | 25 (90759)  |
|          | the median  | 22 (60046)  | 22 (60410)  | 22 (60501)  | 22 (60485)  |
|          | the 3rd Qu. | 12 (30253)  | 13 (30254)  | 13 (30254)  | 12 (30254)  |
| 100 snps | the 1st Qu. | 96 (90063)  | 96 (90757)  | 97 (90671)  | 97 (90752)  |
|          | the median. | 86 (60489)  | 88 (60458)  | 94 (60507)  | 90 (60505)  |
|          | the 3rd Qu. | 56 (30254)  | 55 (30240)  | 57 (30263)  | 57 (30254)  |
| 300 snps | the 1st Qu. | 284 (90632) | 291 (90760) | 289 (90742) | 289 (90760) |
|          | the median  | 233 (60497) | 254 (60497) | 268 (60506) | 264 (60507) |
|          | the 3rd Qu. | 165 (30250) | 168 (30252) | 164 (30252) | 166 (60254) |

|                                                                                           | threshold   | 500        | 1000       | 2000       | 3000       |
|-------------------------------------------------------------------------------------------|-------------|------------|------------|------------|------------|
| 50 snps (LD-prune)                                                                        | the 1st Qu. | 49 (90488) | 50 (90595) | 50 (90757) | 50 (90737) |
|                                                                                           | the median  | 43 (60450) | 45 (60438) | 45 (60479) | 41 (60491) |
|                                                                                           | the 3rd Qu. | 32 (30254) | 33 (30251) | 33 (30253) | 33 (30254) |
| 50 snps (gene <i>pbpX</i> )                                                               | the 1st Qu. | 49 (90589) | 49 (90753) | 49 (90759) | 49 (90756) |
|                                                                                           | the median  | 43 (60054) | 45 (60501) | 46 (60507) | 45 (60465) |
|                                                                                           | the 3rd Qu. | 34 (30251) | 32 (30243) | 33 (30254) | 32 (30253) |
| 50 snps (50% gene <i>pbpX</i> , 50% gene <i>penA</i> )                                    | the 1st Qu. | 47 (90733) | 48 (90753) | 48 (90754) | 48 (90750) |
|                                                                                           | the median. | 40 (60495) | 44 (60123) | 43 (60506) | 42 (60490) |
|                                                                                           | the 3rd Qu. | 25 (30158) | 27 (30253) | 27 (30254) | 26 (30254) |
| 50 snps (16 from gene <i>pbpX</i> , 17 from gene <i>penA</i> , 17 from gene <i>penX</i> ) | the 1st Qu. | 49 (90720) | 49 (90759) | 49 (90752) | 49 (90757) |
|                                                                                           | the median  | 46 (59328) | 47 (60459) | 46 (60471) | 46 (60499) |
|                                                                                           | the 3rd Qu. | 34 (30232) | 34 (30254) | 35 (30254) | 35 (30254) |

|                                                                                           | threshold   | $h^2 = 0.1$ | $h^2 = 0.3$ | $h^2 = 0.6$ | $h^2 = 0.9$ |
|-------------------------------------------------------------------------------------------|-------------|-------------|-------------|-------------|-------------|
| 50 snps (gene <i>pbpX</i> )                                                               | the 1st Qu. | 44 (90760)  | 44 (90760)  | 45 (90760)  | 44 (90760)  |
|                                                                                           | the median  | 44 (60507)  | 44 (60507)  | 44 (60507)  | 44 (60507)  |
|                                                                                           | the 3rd Qu. | 42 (29977)  | 41 (30234)  | 42 (30180)  | 43 (30254)  |
| 50 snps (50% gene <i>pbpX</i> , 50% gene <i>penA</i> )                                    | the 1st Qu. | 44 (90760)  | 45 (90760)  | 45 (90760)  | 45 (90760)  |
|                                                                                           | the median. | 43 (60507)  | 43 (60507)  | 43 (60494)  | 43 (60507)  |
|                                                                                           | the 3rd Qu. | 42 (30254)  | 41 (30254)  | 41 (30254)  | 41 (30254)  |
| 50 snps (16 from gene <i>pbpX</i> , 17 from gene <i>penA</i> , 17 from gene <i>penX</i> ) | the 1st Qu. | 49 (90760)  | 48 (90760)  | 48 (90760)  | 48 (60760)  |
|                                                                                           | the median  | 48 (60507)  | 47 (60507)  | 47 (60507)  | 47 (60506)  |
|                                                                                           | the 3rd Qu. | 41 (30254)  | 42 (30253)  | 42 (30254)  | 43 (30254)  |
